# Supplementary material
Source: HighWire-hosted journal article supplement (https://mcr.aacrjournals.org/content/suppl/2012/06/06/1541-7786.MCR-11-0594)
Supplement: T1_25K.pdf [file T1_25K.pdf]

**Supplementary table 1. Summary of ZNF545 methylation in cell lines and primary carcinomas**

| Samples                                                               | Promoter methylation (%) |
|-----------------------------------------------------------------------|--------------------------|
| <i>Carcinoma cell lines</i>                                           |                          |
| Nasopharyngeal                                                        | 6/6 (100%)               |
| Esophageal                                                            | 12/18 (67%)              |
| Lung                                                                  | 3/5 (60%)                |
| Gastric                                                               | 8/8 (100%)               |
| Colorectal                                                            | 10/10 (100%)             |
| Hepatocellular                                                        | 5/13 (38%)               |
| Breast                                                                | 5/9 (56%)                |
| Renal                                                                 | 5/7 (71%)                |
| Cervical                                                              | 3/4 (75%)                |
| Prostate                                                              | 0/3                      |
| <i>Primary tumors</i>                                                 |                          |
| Nasopharyngeal Ca                                                     | 33/39 (85%)              |
| Esophageal Ca                                                         | 21/31 (68%)              |
| Gastric Ca                                                            | 11/13 (85%)              |
| Colorectal Ca                                                         | 10/11 (91%)              |
| Breast Ca                                                             | 5/22 (23%)               |
| Lung Ca                                                               | 2/13 (15%)               |
| <i>Immortalized normal epithelial cell lines</i>                      |                          |
| NP69, NE1, NE3, Het-1A, NE083, HEK293, CCD841-CoN, HMEC, HMEpC, RHEK1 | 1/10 (10%)               |
| <i>Normal tissues</i>                                                 |                          |
| Normal nasopharyngeal tissues                                         | 0/6                      |
| Normal esophageal epithelial tissues                                  | 0/7                      |
| Surgical-margin esophageal tissue from esophageal cancer patients     | 3/31 (10%)               |
